# Supplementary material
Source: PubMed Central journal article supplement (PMC3616536)
Supplement: mt2012284x1.pdf [file mt2012284x1.pdf]

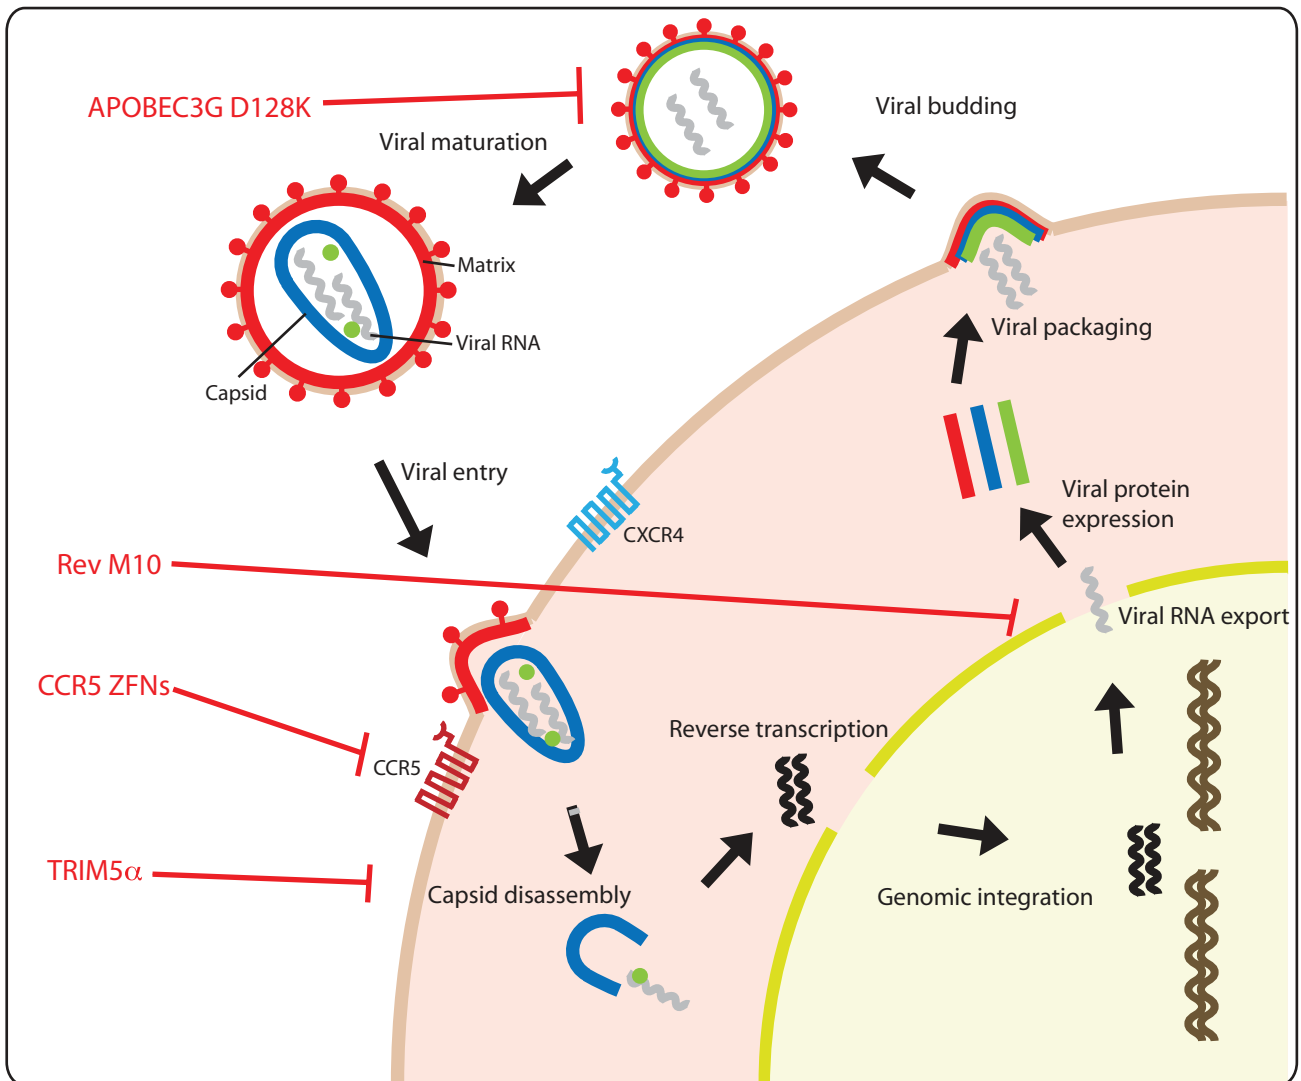

**Supplementary Figure S1: Disruption of the HIV lifecycle by targeted gene therapy.** Current pharmacological therapies simultaneously attack multiple stages of the HIV lifecycle. Similarly, we have designed a ZFN-based targeting strategy to insert into the CCR5 locus the genes APOBEC3G D128K, Rev M10, and human-rhesus TRIM5 $\alpha$ . In doing so, we will stack genetic resistance to both R5-tropic and X4-tropic HIV.

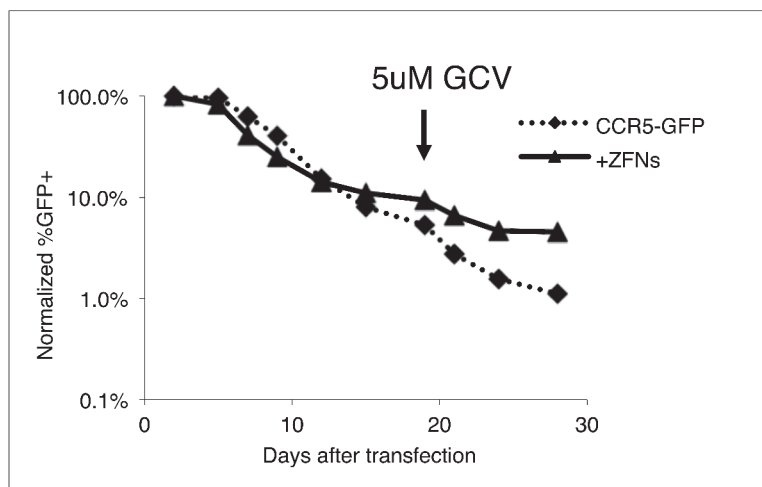

**Supplementary Figure S2: Negative selection with ganciclovir enriches for targeted cells.** On day 19 after transfection with or without ZFNs and with CCR5-GFP, random integrants that preserved the HSV-TK domain were killed by the addition of 5 $\mu$ M ganciclovir. Ganciclovir killed 2.5 fold more cells in the -ZFN sample, indicating a 2.5 fold enrichment of targeted to untargeted cells in the +ZFN sample.

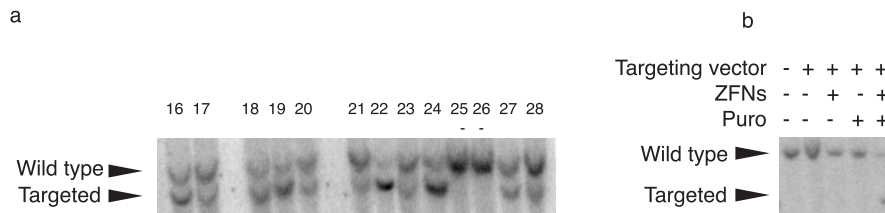

**Supplementary Figure S3: Clonal analysis of K562 cells targeted at CCR5.** (a) Analysis of 13 additional clones targeted at CCR5 with the CCR5-GFP targeting vector using CCR5 probe, as in **Figure 1g**. (b) Southern blot analysis of populations of K562s treated with and without the CCR5-GFP targeting vector, ZFNs and puromycin (puro), as indicated.

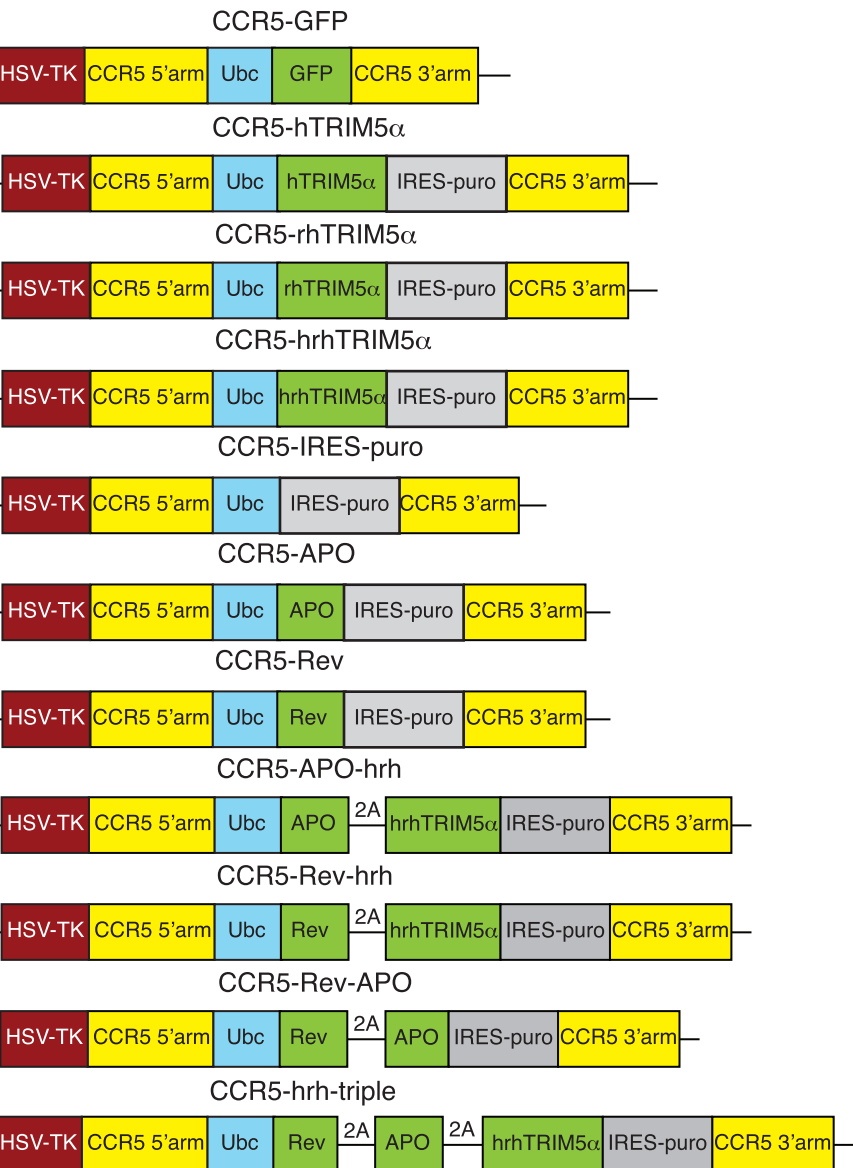

**Supplementary Figure S4: CCR5 targeting vectors.** Schematic representations of CCR5 targeting vectors used in this study. (HSV-TK – herpes simplex virus thymidine kinase, Ubc – ubiquitin C promoter, hTRIM5 $\alpha$  – human TRIM5 $\alpha$ , rhTRIM5 $\alpha$  – rhesus TRIM5 $\alpha$ , hrhTRIM5 $\alpha$  – human-rhesus hybrid TRIM5 $\alpha$ , Rev – Rev M10, APO – APOBEC3G D128K, IRES-puro – internal ribosome entry site – puromycin N-acetyltransferase, 2A – 2A translation skipping peptide).

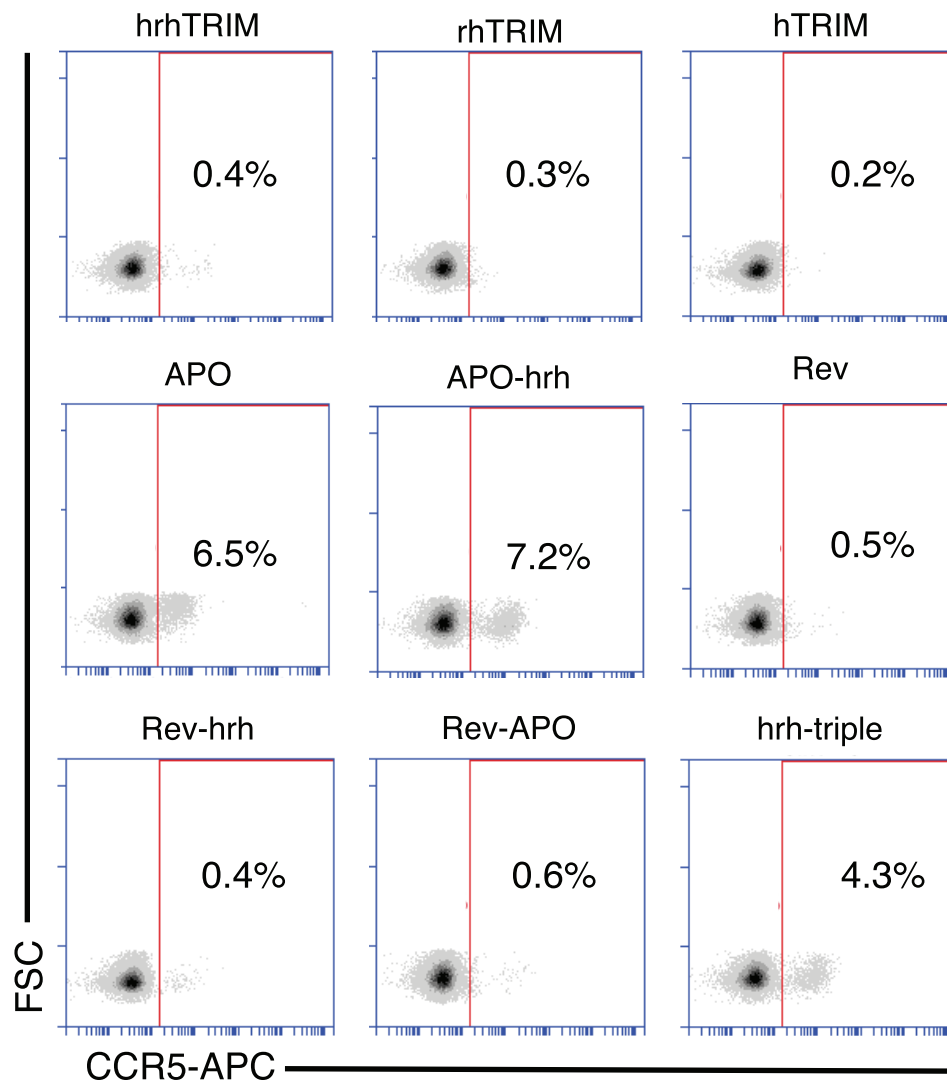

**Supplementary Figure S5: CCR5 expression in targeted cell lines.** ZFN-mediated disruption of CCR5 measured by antibody staining and FACS. Numbers indicate percent of cells with functional CCR5 expression. See also Figure 2d.
